# Supplementary material for: Preliminary Study on the Effect ofBacillus amyloliquefaciensTL on Cecal Bacterial Community Structure of Broiler Chickens
Source: Hindawi journal article supplement (doi:10.1155/2019/5431354), 2019-10-03
Supplement: f1 [file 5431354.f1.pdf]

**Table S1. Composition and nutrient level of basic diets (0–35 days)**

| Ingredient          | Mixture ratio | Nutrient name        | value   |
|---------------------|---------------|----------------------|---------|
| 1-21 days           |               |                      |         |
| Corn                | 56.00         | ME Mcal/kg           | 3.11    |
| Soybean Meal        | 30.00         | Crude protein%       | 23.04   |
| Vegetable Oil       | 4.00          | Calcium%             | 0.99    |
| Premixes            | 1.00          | Lysine%              | 1.33    |
| Salt                | 0.30          | Methionine%          | 0.58    |
| Fishmeal            | 3.20          | Methionine+Cystine%  | 0.94    |
| Limestone           | 1.20          | Available Phosphorus | 0.48    |
| Dicalcium Phosphate | 1.40          |                      |         |
| Corn Gluten Meal    | 2.50          |                      |         |
| Total               | 100           |                      |         |
| 22-35 days          |               |                      |         |
| Corn                | 63.00         | ME Mcal/kg           | 3.2051  |
| Soybean Meal        | 23.00         | Crude protein%       | 20.5710 |
| Vegetable Oil       | 4.20          | Calcium%             | 0.8737  |
| Premixes            | 1.00          | Lysine%              | 1.1803  |
| Salt                | 0.20          | Methionine%          | 0.5590  |
| Fishmeal            | 3.70          | Methionine+Cystine%  | 0.8775  |
| Limestone           | 1.00          | Available Phosphorus | 0.4558  |
| Dicalcium Phosphate | 1.20          |                      |         |
| Corn Gluten Meal    | 2.30          |                      |         |
| Total               | 100           |                      |         |

Note: Supplied per kilogram of diet: vitamin A, 10000.00 IU; vitamin D3, 3000.00 IU; vitamin E, 30.00 IU; vitamin K, 2.20 mg; thiamin, 2.20 mg; riboflavin, 3.00 mg; niacin, 30.00 mg; vitamin B<sub>12</sub>, 0.022 mg; biotin, 0.23 mg; niacin, 40.00 mg; pantothenic acid, 40.00 mg; folic acid, 1.00 mg; Mn, 120.00 mg; Zn, 100.00 mg; Fe, 120.00 mg; Cu, 80.00 mg; I, 0.45 mg; Se, 0.30 mg.

**Table S2.** The relative abundance of *Firmicutes*, *Bacteroidetes*, *Proteobacteria*, and *Tenericutes* in broilers treated with chlortetracycline and *Bacillus amyloliquefaciens* TL and in a control group on days 7, 14, 21, and 35.

| Taxonomy | <i>Firmicutes</i> | <i>Bacteroidetes</i> | <i>Proteobacteria</i> | <i>Tenericutes</i> |
|----------|-------------------|----------------------|-----------------------|--------------------|
| A7       | 0.858311          | 0.005257             | 0.038977              | 0.065403           |
| P7       | 0.889899          | 0.005861             | 0.016449              | 0.042215           |
| C7       | 0.886309          | 0.000459             | 0.016678              | 0.051695           |
| A14      | 0.859936          | 0.00643              | 0.0276                | 0.038805           |
| P14      | 0.852375          | 0.003953             | 0.033928              | 0.044701           |
| C14      | 0.757095          | 0.040313             | 0.070332              | 0.041214           |
| A21      | 0.768345          | 0.014136             | 0.021959              | 0.040757           |
| P21      | 0.767178          | 0.029265             | 0.039586              | 0.041946           |
| C21      | 0.556751          | 0.23953              | 0.067086              | 0.040143           |
| A35      | 0.71719           | 0.100204             | 0.036267              | 0.06729            |
| P35      | 0.728244          | 0.101312             | 0.034155              | 0.041119           |
| C35      | 0.606999          | 0.236127             | 0.03757               | 0.036152           |

‘A’ = Chlortetracycline group, ‘P’ = *Bacillus amyloliquefaciens* TL group, ‘C’ = control group

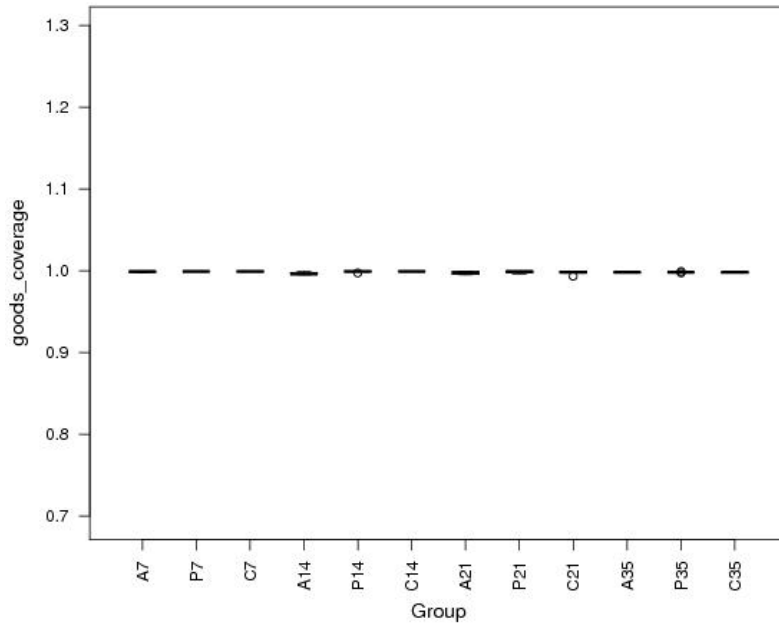

**Figure S1.** The goods\_coverage index of the 80 broilers treated with Chlortetracycline and *Bacillus amyloliquefaciens* TL and in a control group on days 7, 14, 21, 35. ‘A’ = Chlortetracycline group, ‘P’ = *Bacillus amyloliquefaciens* TL group, ‘C’ = control group.

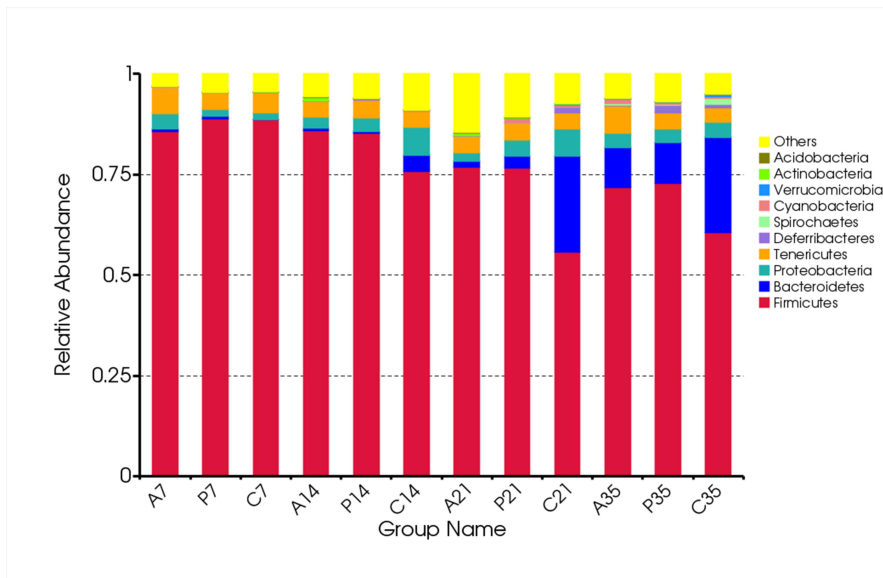

**Figure S2.** Relative abundances at the phylum level of the main bacteria found in the cecum of 80 broiler chicken treated with Chlortetracycline and *Bacillus amyloliquefaciens* TL and in a control group on days 7, 14, 21, 35. ‘A’ = Chlortetracycline group, ‘P’ = *Bacillus amyloliquefaciens* TL group, ‘C’ = control group.
